# Supplementary material for: Strategies to Limit Benzodiazepine Use in Anesthesia for Older Adults: A Randomized Clinical Trial
Source: PubMed Central journal article supplement (PMC11528310; doi:10.1001/jamanetworkopen.2024.42207), 2024-10-31
Supplement: jamanetwopen-e2442207-s002.pdf [file jamanetwopen-e2442207-s002.pdf]

## Supplemental Online Content

Neuman MD, Feng R, Shukla A, et al. Benzodiazepine reduction in anesthesia care for older adults: a randomized clinical trial. *JAMA Netw Open*. 2024;7(10):e2442207. doi:10.1001/jamanetworkopen.2024.42207

**eTable 1.** Study Divisions

**eFigure 1.** Study Randomization Scheme

**eFigure 2.** Physician Peer Comparison Message: High-Performer Alert

**eFigure 3.** Physician Peer Comparison Message: Moderate-Performer Alert

**eFigure 4.** Physician Peer Comparison Message: Low-Performer Alert

**eFigure 5.** Patient Informational Mailing Text

**eTable 2.** Race and Ethnicity Information for Study Participants Providing Data

**eTable 3.** Standardized Differences for Individual Study Covariates Versus Control Group

**eMethods.** Information on Mixed-Effects Logistic Model

**eTable 4.** Simplified Regression Model Results for Primary Outcome

**eFigure 6.** Subgroup Analyses

**eTable 5.** Patient Satisfaction Item Responses

**eTable 6.** Adverse Events by Study Group

This supplemental material has been provided by the authors to give readers additional information about their work.

**eTable 1: Study divisions.** “Facilities” include hospitals, outpatient surgery centers, and physician offices. At the time of study planning, we anticipated implementation of the interventions at 423 facilities across 24 practice divisions. Prior to study start, division 11 (4 facilities) and division 18 (4 facilities) de-integrated from the group practice. These divisions were not included in the study and no data were collected on patients treated at these locations.

| <b>N</b> | <b>Study division</b> | <b>Number of facilities included</b> |
|----------|-----------------------|--------------------------------------|
| 1        | USAP Austin           | 26                                   |
| 2        | USAP Colorado A       | 10                                   |
| 3        | USAP Colorado B       | 14                                   |
| 4        | USAP Colorado C       | 27                                   |
| 5        | USAP Dallas A         | 28                                   |
| 6        | USAP Dallas B         | 21                                   |
| 7        | USAP Dallas C         | 10                                   |
| 8        | USAP Dallas D         | 55                                   |
| 9        | USAP Houston A        | 8                                    |
| 10       | USAP Houston B        | 16                                   |
| 11       | USAP Houston C        | 4 <sup>a</sup>                       |
| 12       | USAP Houston D        | 26                                   |
| 13       | USAP Kansas           | 2                                    |
| 14       | USAP Maryland A       | 13                                   |
| 15       | USAP Maryland B       | 40                                   |
| 16       | USAP Nevada A         | 7                                    |
| 17       | USAP Nevada A         | 26                                   |
| 18       | USAP Oklahoma         | 4 <sup>a</sup>                       |
| 19       | USAP Florida A        | 30                                   |
| 20       | USAP Florida B        | 7                                    |
| 21       | USAP Florida C        | 13                                   |
| 22       | USAP San Antonio A    | 11                                   |
| 23       | USAP San Antonio B    | 11                                   |
| 24       | USAP Washington       | 14                                   |

a. Division de-integrated prior to study start; no data collected

|         |   | Period |          |          |          |          |
|---------|---|--------|----------|----------|----------|----------|
|         |   | 1      | 2        | 3        | 4        | 5        |
| Cluster | 1 |        | Blue     | Blue     | Blue     | Blue     |
|         | 2 |        |          | Blue     | Stippled | Stippled |
|         | 3 |        |          | Stippled | Stippled | Stippled |
|         | 4 |        | Stippled | Stippled | Stippled | Stippled |

**eFigure1. Study randomization scheme.** Practices were randomized in clusters of 6 units to one of four study sequences shown above. In the initial period, no divisions received either intervention; each intervention (peer comparison feedback, blue cells; patient informational letter, stippled cells) was subsequently initiated at a new cluster of practices based on the assigned sequence.

Quality Improvement Project Sponsored by USAP's Chief Quality Officer

**Top Performer Alert!**

You are a top performer. You have a low rate of benzodiazepine administration for older ( $\geq 65$  yrs) surgical patients undergoing general anesthesia.

Please continue to work to limit potentially avoidable medications to older surgical patients.

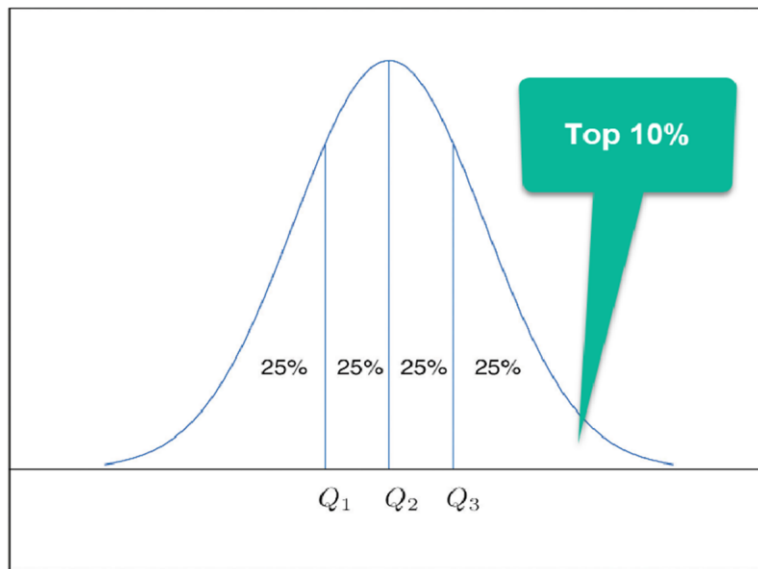

Questions? Email [Richard.Dutton@usap.com](mailto:Richard.Dutton@usap.com)

eFigure 2: Physician peer comparison message: high-performer alert

### MIDAZOLAM ADMINISTRATION SCORECARD

Quality Improvement Project Sponsored by USAP's Chief Quality Officer

**Moderate Performer Alert!**

Your benzodiazepine administration rate for older ( $\geq 65$  yrs) surgical patients undergoing general anesthesia falls between 11-51%. Top performer rate is  $\leq 10\%$

You may be administering midazolam to too many older adults; this is known to contribute postoperative cognitive dysfunction.

Please continue to work to limit potentially avoidable medications to older surgical patients.

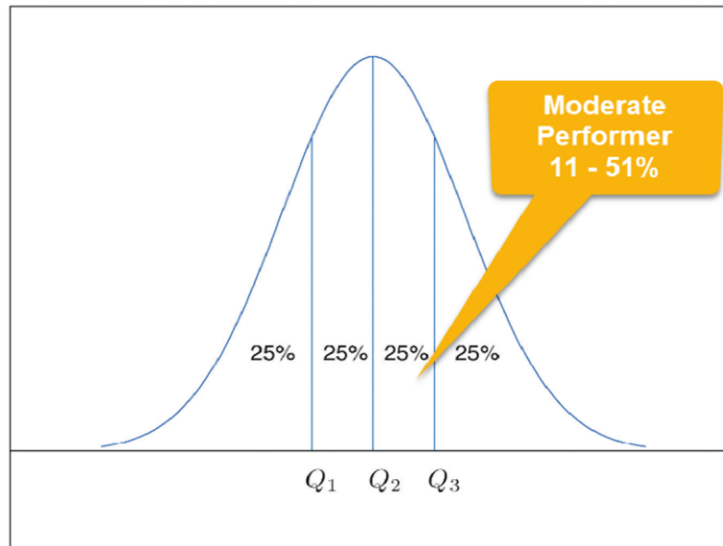

Questions? Email [Richard.Dutton@usap.com](mailto:Richard.Dutton@usap.com)

eFigure 3: Physician peer comparison message: moderate-performer alert

Quality Improvement Project Sponsored by USAP's Chief Quality Officer

**Opportunity for Improvement Alert!**

Your benzodiazepine administration rate for older (>= 65 yrs) surgical patients undergoing general anesthesia is greater than 51%, which falls below the median USAP performance.

You may be administering midazolam to too many older adults; this is known to contribute postoperative cognitive dysfunction.

Please continue to work to limit potentially avoidable medications to older surgical patients.

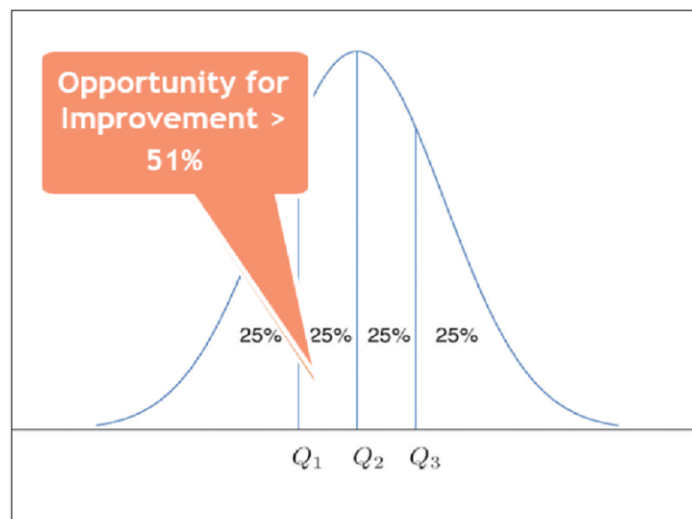

Questions? Email [Richard.Dutton@usap.com](mailto:Richard.Dutton@usap.com)

eFigure 4: Physician peer comparison message: low-performer alert

Dear Patient:

Thank you for trusting US Anesthesia Partners with your upcoming medical procedure. We look forward to caring for you.

As your anesthesia team, USAP is committed to keeping you healthy during and after surgery. We understand that many people have questions about their anesthesia care, as well as the potential implications of anesthesia for brain health.

As the Chief Quality Officer of USAP, I encourage you to ask about the anesthesia plan--including care you will receive before, during, and after surgery--when you see us before your procedure. This will help us find the best choice of medicines for you and your specific situation.

Sincerely,

Richard P. Dutton, MD, MBA  
Chief Quality Officer, USAP

Adjunct Professor of Anesthesiology  
Texas A&M University College of Medicine

eFigure 5: Patient informational mailing text

| eTable 2: Race and ethnicity information for study participants providing data |                 |                       |                      |                                    |
|--------------------------------------------------------------------------------|-----------------|-----------------------|----------------------|------------------------------------|
|                                                                                | No intervention | Peer comparisons only | Patient mailing only | Peer comparisons + patient mailing |
| <b>Race</b>                                                                    |                 |                       |                      |                                    |
| White                                                                          | 11,858 (88.3%)  | 2,314 (88.3%)         | 2,581 (89.1%)        | 2,721 (88.1%)                      |
| Black or African American                                                      | 917 (6.8%)      | 156 (6.0%)            | 201 (6.9%)           | 220 (7.1%)                         |
| American Indian or Alaskan Native                                              | 151 (1.1%)      | 17 (0.7%)             | 12 (0.4%)            | 13 (0.4%)                          |
| Asian                                                                          | 318 (2.4%)      | 46 (1.8%)             | 37 (1.6%)            | 48 (1.6%)                          |
| Other                                                                          | 136 (1.0%)      | 58 (2.2%)             | 39 (1.6%)            | 49 (1.6%)                          |
| More than one race                                                             | 49 (0.36%)      | 30 (1.14%)            | 28 (1.3%)            | 39 (1.3%)                          |
| Total reporting                                                                | 13,429          | 2,621                 | 2,898                | 3,090                              |
| <b>Hispanic ethnicity</b>                                                      |                 |                       |                      |                                    |
| Yes                                                                            | 984 (7.2%)      | 153 (5.9%)            | 196 (6.7%)           | 230 (7.5%)                         |
| No                                                                             | 12,725 (92.8%)  | 2,441 (94.1%)         | 2,709 (93.2%)        | 2,857 (92.5%)                      |
| Total reporting                                                                | 13,709          | 2,594                 | 2,905                | 3,087                              |



| eTable 3: Standardized differences for individual study covariates versus control group |                       |                      |                                    |
|-----------------------------------------------------------------------------------------|-----------------------|----------------------|------------------------------------|
| Characteristic                                                                          | Peer comparisons only | Patient mailing only | Peer comparisons + patient mailing |
| Age in years                                                                            | 0.071                 | 0.044                | 0.087                              |
| Male sex                                                                                | 0.014                 | -0.008               | 0.008                              |
| Female sex                                                                              | -0.014                | 0.008                | -0.008                             |
| Case duration in minutes                                                                | 0.006                 | -0.061               | 0.0003                             |
| American Society of Anesthesiologists Physical Status                                   |                       |                      |                                    |
| I: No systemic disease                                                                  | 0.005                 | -0.014               | -0.014                             |
| II: Mild systemic disease                                                               | -0.034                | -0.003               | -0.051                             |
| III: Severe systemic disease                                                            | 0.004                 | 0.030                | 0.038                              |
| IV or V: Severe systemic disease that is a constant threat to life or moribund patient  | 0.037                 | -0.037               | 0.016                              |
| Surgery type                                                                            |                       |                      |                                    |
| Endoscopic                                                                              | -0.030                | 0.025                | -0.022                             |
| General/abdominal                                                                       | -0.031                | -0.040               | -0.017                             |
| Orthopedic                                                                              | 0.051                 | 0.046                | 0.021                              |
| Urologic                                                                                | -0.015                | -0.098               | -0.009                             |
| Neurosurgery/Spine                                                                      | -0.025                | 0.043                | -0.012                             |
| Cardiology                                                                              | 0.039                 | 0.030                | 0.007                              |
| Vascular                                                                                | 0.017                 | -0.002               | 0.007                              |
| Cardiac                                                                                 | 0.016                 | 0.009                | -0.001                             |
| Ear, nose, and throat                                                                   | -0.006                | -0.033               | -0.004                             |
| Gynecology                                                                              | -0.038                | -0.005               | -0.022                             |
| Thoracic                                                                                | 0.011                 | -0.014               | 0.019                              |
| Ophthalmology                                                                           | 0.012                 | 0.002                | -0.015                             |
| Cosmetic                                                                                | -0.013                | -0.046               | -0.015                             |

| eTable 3: Standardized differences for individual study covariates versus control group |                                         |                       |                      |                                    |
|-----------------------------------------------------------------------------------------|-----------------------------------------|-----------------------|----------------------|------------------------------------|
| Characteristic                                                                          |                                         | Peer comparisons only | Patient mailing only | Peer comparisons + patient mailing |
|                                                                                         | Radiology                               | 0.007                 | -0.017               | -0.010                             |
|                                                                                         | Other                                   | 0.051                 | 0.055                | 0.091                              |
| Insurance type                                                                          |                                         |                       |                      |                                    |
|                                                                                         | Commercial                              | 0.004                 | 0.026                | 0.013                              |
|                                                                                         | Government                              | -0.001                | -0.013               | -0.006                             |
|                                                                                         | Other                                   | -0.006                | -0.030               | -0.017                             |
| Years in practice                                                                       |                                         | 0.031                 | 0.055                | -0.034                             |
| Care mode                                                                               |                                         |                       |                      |                                    |
|                                                                                         | Solo                                    | 0.083                 | 0.021                | -0.139                             |
|                                                                                         | Team                                    | -0.083                | -0.021               | 0.139                              |
| Service location                                                                        |                                         |                       |                      |                                    |
|                                                                                         | Inpatient hospital/Emergency Department | -0.081                | 0.056                | -0.011                             |
|                                                                                         | Other                                   | 0.081                 | -0.056               | 0.011                              |
| Race                                                                                    |                                         |                       |                      |                                    |
|                                                                                         | White                                   | 0.000                 | 0.025                | -0.006                             |
|                                                                                         | Black or African American               | -0.033                | 0.004                | 0.012                              |
|                                                                                         | American Indian or Alaskan Native       | -0.042                | -0.081               | -0.081                             |
|                                                                                         | Asian                                   | -0.042                | -0.082               | -0.057                             |
|                                                                                         | Other                                   | 0.095                 | 0.028                | 0.053                              |
|                                                                                         | More than one race                      | 0.090                 | 0.078                | 0.104                              |
| Hispanic ethnicity                                                                      |                                         |                       |                      |                                    |
|                                                                                         | Yes                                     | -0.052                | -0.016               | 0.011                              |
|                                                                                         | No                                      | 0.052                 | 0.016                | -0.011                             |

## Supplementary methods: information on mixed-effects logistic model

The mixed-effects logistic model can be written as:

$$\text{Logit}(P(Y_{ijk}=1)) = \beta_0 + \beta_1 * \text{treatmentA} + \beta_2 * \text{treatmentB} + \beta_3 * \text{treatmentA \& treatmentB} + \beta_4 * \text{age} + \beta_5 * \text{male} + \beta_6 * \text{surgery duration} + \beta_7 * \text{severe ASA (III or IV)} + \beta_8 * \text{surgery type 1} + \dots + \beta_{21} * \text{surgery type 15} + \beta_{22} * \text{private insurance} + \beta_{23} * \text{period 2} + \dots + \beta_{26} * \text{period 5} + \gamma_{1j} + \gamma_{2j}^k$$

Where

- $i$  is the index for subject,  $j$  is the index for assigned cluster for subject  $i$ ,  $k$  index for the center within each cluster.
- $\beta_0$  is the fixed intercept
- $\beta_1$ ,  $\beta_2$ , and  $\beta_3$ , are the fixed treatment and interaction effects
- $\beta_4$ ,  $\dots$ ,  $\beta_{26}$  are the fixed covariate effects of age, gender, ASA status, surgery type, and time period.
- $\gamma_{1j}$  represents the random effect for the  $j$ -th cluster (e.g., cluster-specific intercept) and is assumed to follow normal distributions with mean zero and variances  $\sigma^2_1$ .
- $\gamma_{2j}^k$  represents the random effect for the  $k$ -th hospital nested within the  $j$ -th cluster, and is assumed to follow normal distributions with mean zero and variances  $\sigma^2_{2j}$ .

eTable 4: Simplified regression model results for primary outcome.

|                                              | <b>Odds Ratio, 95% Confidence Interval<sup>a</sup></b> |
|----------------------------------------------|--------------------------------------------------------|
| <b>Physician peer comparisons only</b>       | 1.00 (0.96-1.04)                                       |
| <b>Patient mailing only</b>                  | 1.00 (0.96-1.04)                                       |
| <b>Peer comparisons plus patient mailing</b> | 1.09 (1.04-1.14)                                       |

a. Adjusted for study period only

eFigure 6: Subgroup analyses

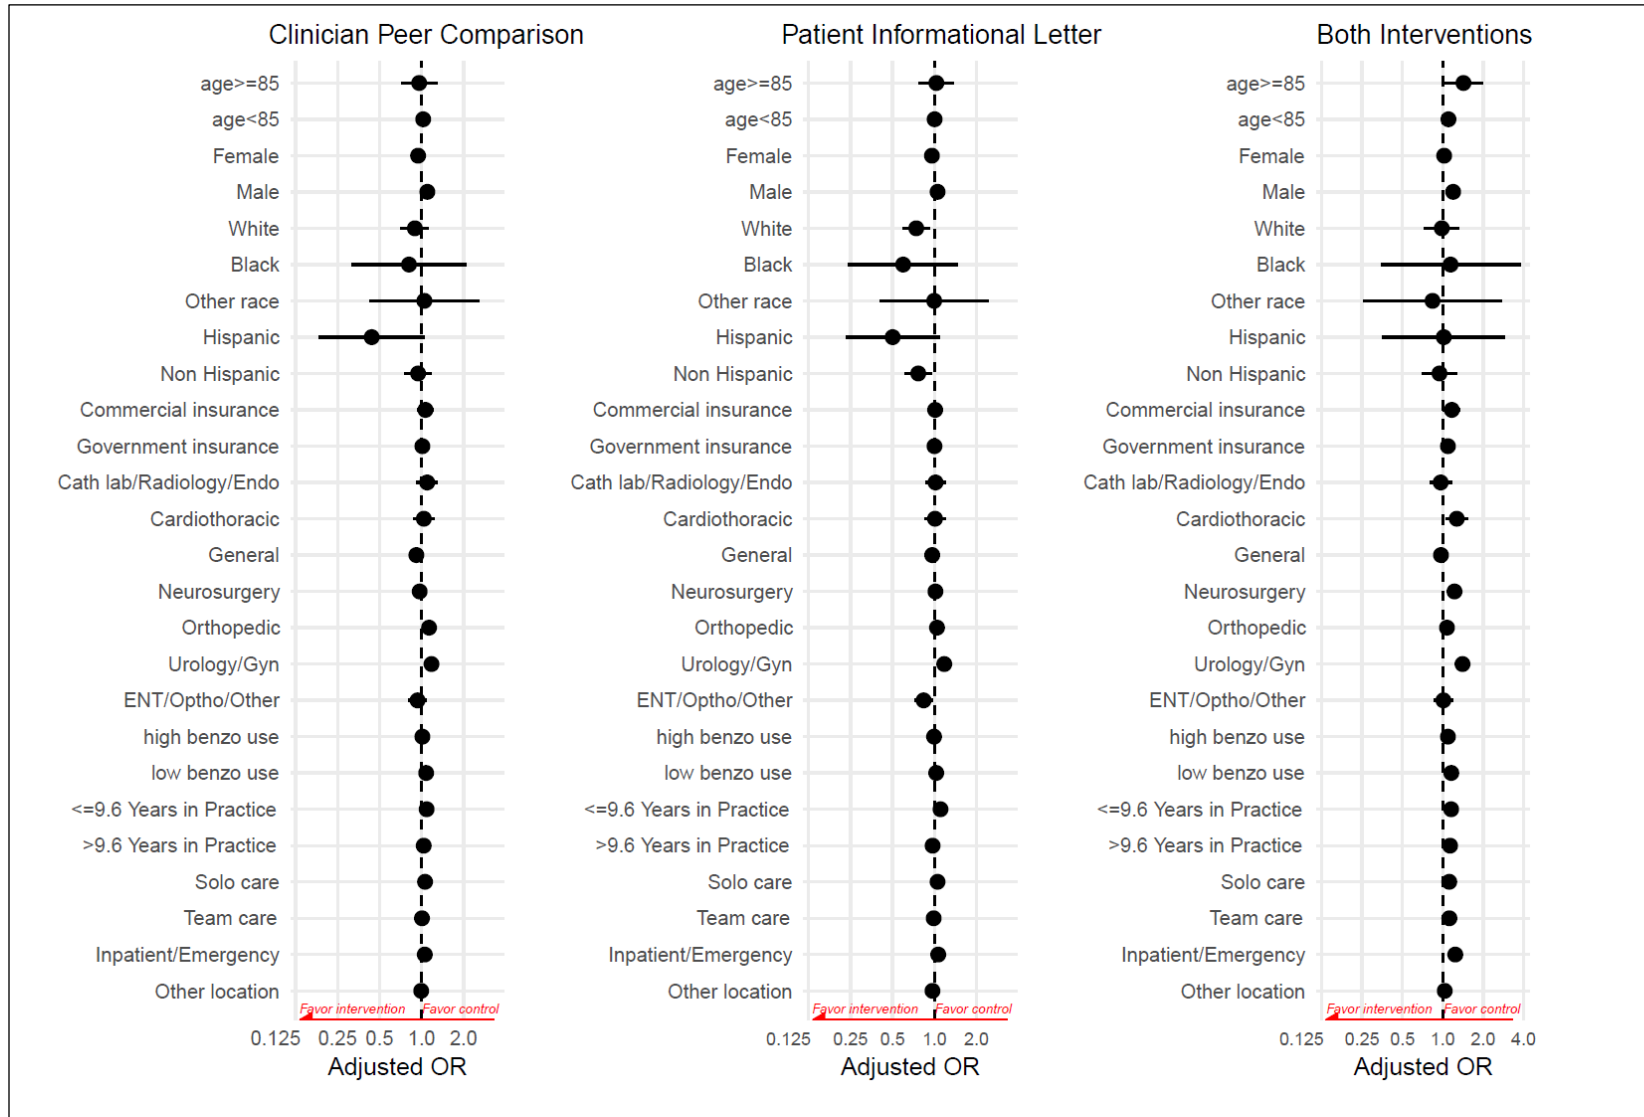

| eTable 5: Patient satisfaction item responses.                                                 |                                         |                                  |                                 |                                 |                            |
|------------------------------------------------------------------------------------------------|-----------------------------------------|----------------------------------|---------------------------------|---------------------------------|----------------------------|
|                                                                                                |                                         | No<br>intervention<br>(N=159674) | Intervention A<br>only(N=81363) | Intervention B<br>only(N=98520) | Intervention A+B(N=169712) |
| Your options for anesthesia were explained before your surgery.                                | Disagree, disagree strongly, or neutral | 1,576 (9.95%)                    | 305 (5.77%)                     | 349 (6.08%)                     | 267 (5.67%)                |
|                                                                                                | Agree or agree strongly                 | 14,271 (90.05%)                  | 4,983 (94.23%)                  | 5,394 (93.92%)                  | 4,439 (94.33%)             |
| Your questions about anesthesia, the process, risks, and possible after effects were answered. | Disagree, disagree strongly, or neutral | 1,127 (7.42%)                    | 238 (4.98%)                     | 224 (4.35%)                     | 177 (4.14%)                |
|                                                                                                | Agree or agree strongly                 | 14,056 (92.58%)                  | 4545 (95.02%)                   | 4,920 (95.65%)                  | 4,102 (95.86%)             |
| You were well prepared to make informed decisions.                                             | Disagree, disagree strongly, or neutral | 878 (5.33%)                      | 282 (5.11%)                     | 327 (5.38%)                     | 226 (4.45%)                |
|                                                                                                | Agree or agree strongly                 | 1,5596 (94.67%)                  | 5,233 (94.89%)                  | 5,754 (94.62%)                  | 4,847 (95.55%)             |
| Your anesthesia provider helped ease any anxiety you were feeling.                             | Disagree, disagree strongly, or neutral | 936 (6.15%)                      | 294 (5.51%)                     | 302 (5.20%)                     | 238 (4.99%)                |
|                                                                                                | Agree or agree strongly                 | 14,277 (93.85%)                  | 5,039 (94.49%)                  | 5,503 (94.80%)                  | 4,531 (95.01%)             |

eTable 5: Patient satisfaction item responses.

|                                                                                                                                                                                |                                         | No<br>intervention<br>(N=159674) | Intervention A<br>only(N=81363) | Intervention B<br>only(N=98520) | Intervention A+B(N=169712) |
|--------------------------------------------------------------------------------------------------------------------------------------------------------------------------------|-----------------------------------------|----------------------------------|---------------------------------|---------------------------------|----------------------------|
| On a scale of 1 to 5, where 1 indicates the worst anesthesia experience and 5 indicates the best anesthesia experience, how would you rate your overall anesthesia experience? | Score 1, 2, or 3                        | 812 (4.28%)                      | 268 (4.00%)                     | 308 (4.16%)                     | 204 (3.61%)                |
|                                                                                                                                                                                | Score 4 or 5                            | 18,144 (95.72%)                  | 6,424 (96.00%)                  | 7,098 (95.84%)                  | 5,447 (96.39%)             |
| Using a number from 5 to 1, where 5 is the best anesthesiologist possible and 1 is the worst, please rate your anesthesiologist.                                               | Score 1, 2, or 3                        | 462 (2.90%)                      | 171 (3.03%)                     | 167 (2.70%)                     | 147 (2.91%)                |
|                                                                                                                                                                                | Score 4 or 5                            | 15,495 (97.10%)                  | 5,466 (96.97%)                  | 6,011 (97.30%)                  | 4,900 (97.09%)             |
| Your anesthesia provider did his or her best to respect your privacy.                                                                                                          | Disagree, disagree strongly, or neutral | 527 (3.37%)                      | 236 (4.33%)                     | 263 (4.40%)                     | 142 (2.88%)                |
|                                                                                                                                                                                | Agree or agree strongly                 | 15,101 (96.63%)                  | 5,211 (95.67%)                  | 5,709 (95.60%)                  | 4,794 (97.12%)             |
| Your anesthesia provider ensured your comfort during the surgical experience.                                                                                                  | Disagree, disagree strongly, or neutral | 712 (4.36%)                      | 240 (4.33%)                     | 259 (4.26%)                     | 178 (3.58%)                |
|                                                                                                                                                                                | Agree or agree strongly                 | 15,633 (95.64%)                  | 5,308 (95.67%)                  | 5,827 (95.74%)                  | 4,794 (96.42%)             |

| eTable 6: Adverse events by study group             |                 |                                    |                 |                                   |
|-----------------------------------------------------|-----------------|------------------------------------|-----------------|-----------------------------------|
| Category                                            | No intervention | Clinician peer comparison feedback | Patient mailing | Peer comparison + patient mailing |
| Bleeding/transfusion                                | 5               | 4                                  | 5               | 2                                 |
| Cardiac complications                               | 178             | 110                                | 93              | 163                               |
| Death                                               | 10              | 7                                  | 11              | 13                                |
| Hyper/Hypoglycemia                                  | 4               | 2                                  | 0               | 2                                 |
| Hyper/hypothermia                                   | 34              | 7                                  | 10              | 29                                |
| Injury/medication reaction/procedural complications | 35              | 15                                 | 14              | 34                                |
| Neurological disorders                              | 13              | 10                                 | 6               | 5                                 |
| Other                                               | 107             | 69                                 | 57              | 118                               |
| Pain                                                | 81              | 17                                 | 62              | 80                                |
| Postoperative nausea/vomiting                       | 177             | 0                                  | 139             | 386                               |
| Respiratory/airway                                  | 158             | 89                                 | 76              | 132                               |
| Vascular complications                              | 1               | 1                                  | 1               | 1                                 |
| <b>Total</b>                                        | <b>803</b>      | <b>331</b>                         | <b>474</b>      | <b>965</b>                        |
