# Supplementary material for: Strategies to Limit Benzodiazepine Use in Anesthesia for Older Adults: A Randomized Clinical Trial
Source: PubMed Central journal article supplement (PMC11528310; doi:10.1001/jamanetworkopen.2024.42207), 2024-10-31
Supplement: jamanetwopen-e2442207-s003.pdf [file jamanetwopen-e2442207-s003.pdf]

## Data Sharing Statement

Neuman. Strategies to Limit Benzodiazepine Use in Anesthesia for Older Adults. *JAMA Netw Open*. Published October 31, 2024. doi:10.1001/jamanetworkopen.2024.42207

### Data

**Additional Information:** Clinicaltrials.gov identifier NCT05436392

**Data available:** No

### Additional Information

**Explanation for why data not available:** Unable to share data due to DUA terms
